# Supplementary material for: Metabolic syndrome and collateral vessel formation in patients with documented occluded coronary arteries: association with hyperglycaemia, insulin-resistance, adiponectin and plasminogen activator inhibitor-1
Source: PubMed Central journal article supplement — Eur Heart J. 2009 Jan 22;30(7):840–9. doi: 10.1093/eurheartj/ehn569 (PMC2663725; doi:10.1093/eurheartj/ehn569), 2009-01-22
Supplement: ehn569_1.pdf [file ehn569_1.pdf]

## SUPPLEMENTARY DATA

### *Supplementary data 1: Angiography procedure and coronary collaterals grading*

Severity of coronary artery disease(single, 2 or 3-vessel-disease) was defined as the presence of at least one significant( $\geq 50\%$ ) stenosis in each of the 3 major coronary vessels. Anterograde blood flow was graded with the use of the TIMI classification. A complete coronary occlusion was defined as a 100% stenosis associated with a TIMI grade flow=0 or 1. In patients with more than one occluded coronary artery, one was randomly selected for further analysis of collateral vessels.

The flow in the collateral vessels was graded with the use of 2 previously validated semi-quantitative methods; the “Collateral flow grade” and the “Recipient filling grade”(also known as the modified Rentrop Classification) were chosen because they have been previously validated and are considered complementary<sup>12</sup>. The “Collateral flow grade” mainly appreciates the size of the collateral itself whereas the “Recipient filling grade” is more focused on the resulting flow in the occluded vessel<sup>12</sup>.

1) *Collateral flow grade* : 0=no flow in the collateral; 1=the collateral is barely apparent; dye is not visible throughout the cardiac cycle but is present in at least 3 consecutive frames; 2=the collateral is moderately opaque but is present throughout at 75% of the cardiac cycle; 3=the collateral is well opacified and the column of dye is well defined but is  $< 0.7$  mm wide throughout the majority of its length; 4=the collateral is well opacified, fills antegrade, and is very large,  $> 0.7$ mm in diameter throughout its entire length. In patients with more than one collateral vessel, the collateral vessel with the highest “collateral flow grade” value was used for further analysis.

2) *Recipient filling grade(Modified Rentrop Classification)* : 0=no angiographically apparent collaterals; 1=apparent collaterals extend into a region of myocardium with no angiographically apparent recipient vessel; 2=minimal recipient filling by collaterals is manifested by minor side branch filling and no epicardial artery or epicardial side branch filling; 3=Moderate recipient filling by collaterals is manifested by

complete filling of epicardial side branches and partial filling of a major epicardial artery; 4=there is complete filling of a major epicardial segment. In patients with more than one collateral vessel, the highest “recipient filling grade” value was used for further analysis.

***Supplementary data 2: Isolation, culture and phenotyping of Colony forming unit endothelial cells***

Peripheral blood mononuclear cells were isolated by ficoll density gradient centrifugation(Eurobio) from 20 mL blood sample and plated on fibronectin-coated six-well plates in EndoCult<sup>®</sup> Medium. After 48 hours, non-adherent cells were collected and plated in replicate fibronectin-coated 24-well plates. Colonies were quantified three days later. Endothelial phenotype was confirmed by immunofluorescent staining for endothelial specific markers(Von Willebrand factor and KDR), and typical uptake of 1,1'-dioctadecyl-3,3,3',3'-tetramethylindocarbocyanine perchlorate-acetylated low density lipoprotein(Dil-acLDL Biomedical Technology)<sup>16</sup>. Colony forming units endothelial cells(CFU-ECs) were counted as previously described<sup>15</sup>. Results were expressed as number of colonies/ mL. Measurement of VEGF concentration of supernatant was performed as previously described<sup>17</sup>.

**Supplementary data 3: Summary of previous studies investigating the impact of diabetes mellitus or metabolic syndrome on coronary collateral development in patients with chronic coronary artery disease**

| <b>Author</b>           | <b>Patients' selection</b> | <b>Total population (n)</b> | <b>Patients with coronary occlusion(n)</b> | <b>Data on duration of occlusion</b> | <b>Method of analysis of collaterals</b> | <b>Effect of Diabetes or Metabolic syndrome</b> |
|-------------------------|----------------------------|-----------------------------|--------------------------------------------|--------------------------------------|------------------------------------------|-------------------------------------------------|
| Ilia <sup>23</sup>      | Angiography                | 231                         | 103                                        | No                                   | Angiography                              | D : No effect                                   |
| Abaci <sup>25</sup>     | Angiography                | 410                         | Unknown                                    | No                                   | Angiography                              | D : Decrease collaterals                        |
| Mélidonis <sup>28</sup> | Angiography                | 690                         | 183                                        | No                                   | Angiography                              | D : Increase collaterals                        |
| Kilian <sup>26</sup>    | Angiography                | 200                         | 200                                        | No                                   | Angiography                              | D : Decrease collaterals                        |
| Kornowski <sup>24</sup> | Angiography                | 112                         | 112                                        | No                                   | Angiography                              | D: No effect                                    |
| Werner <sup>27</sup>    | PTCA                       | 90                          | 90                                         | Yes                                  | Doppler wire                             | D: Decrease collaterals in some subgroups       |
| Olijohek <sup>7</sup>   | PTCA                       | 227                         | 24                                         | No                                   | Angiography                              | MS: No effect                                   |
| Present study           | Angiography                | 387                         | 387                                        | Yes                                  | Angiography                              | MS : Decrease collaterals                       |

D=Diabetes mellitus; MS=Metabolic syndrome
